# Supplementary material for: Development of a sensor for the selective detection of manganese in aqueous media using grapefruit peel pectin-decorated silver nanoparticles
Source: Royal Society of Chemistry journal article supplement (doi:10.1039/d5ra08769d), 2026-01-01
Supplement: d5ra08769d1.pdf [file d5ra08769d1.pdf]

## Supplemental information

### Development of a sensor for selective detection of manganese in aqueous media by using grapefruit peel pectin-decorated silver nanoparticles

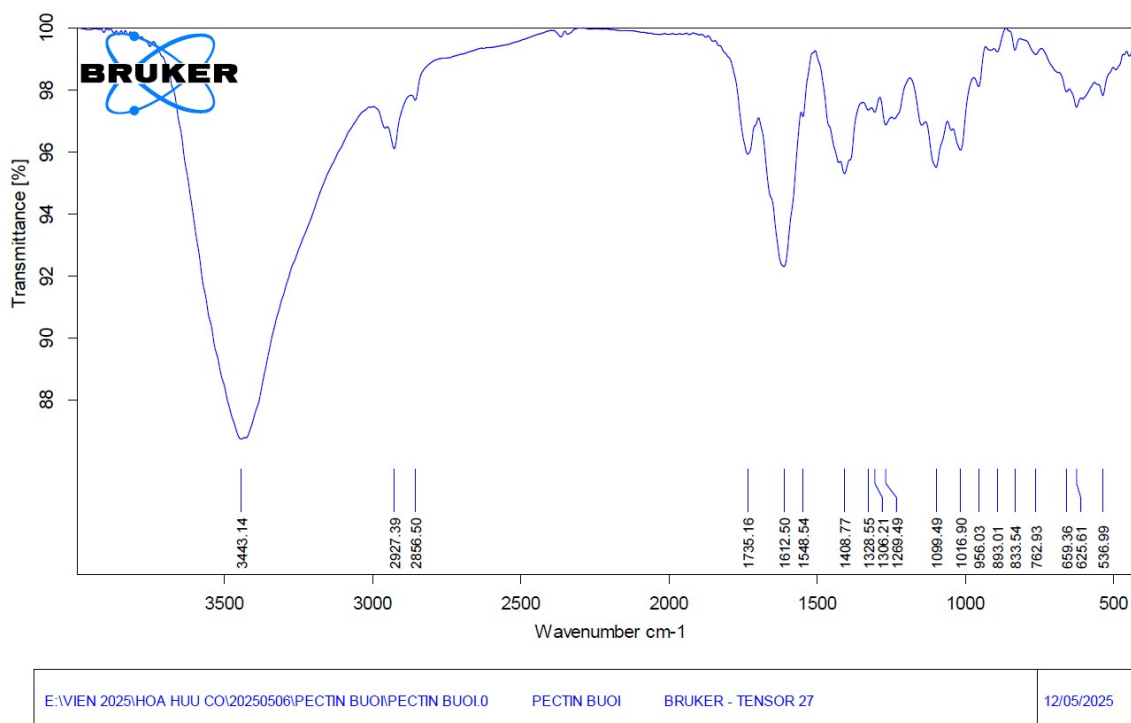

**Figure S1: The FTIR spectrum of grapefruit pectin.**

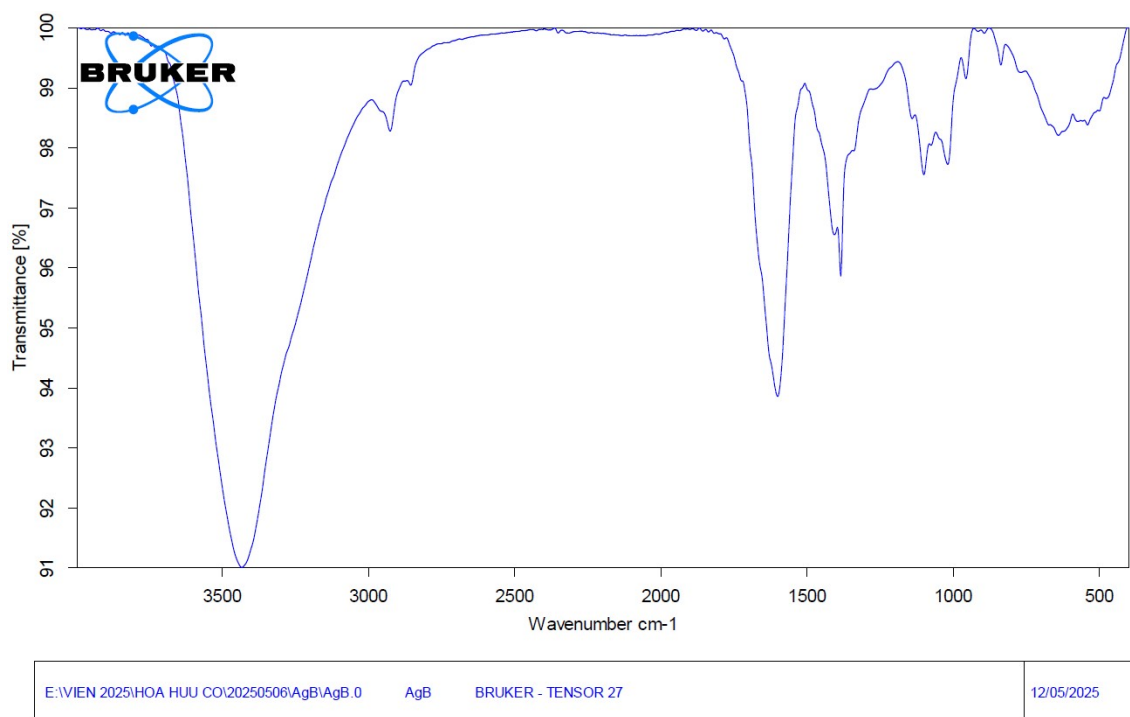

**Figure S2: The FTIR of pectin-decorated silver nanoparticles.**

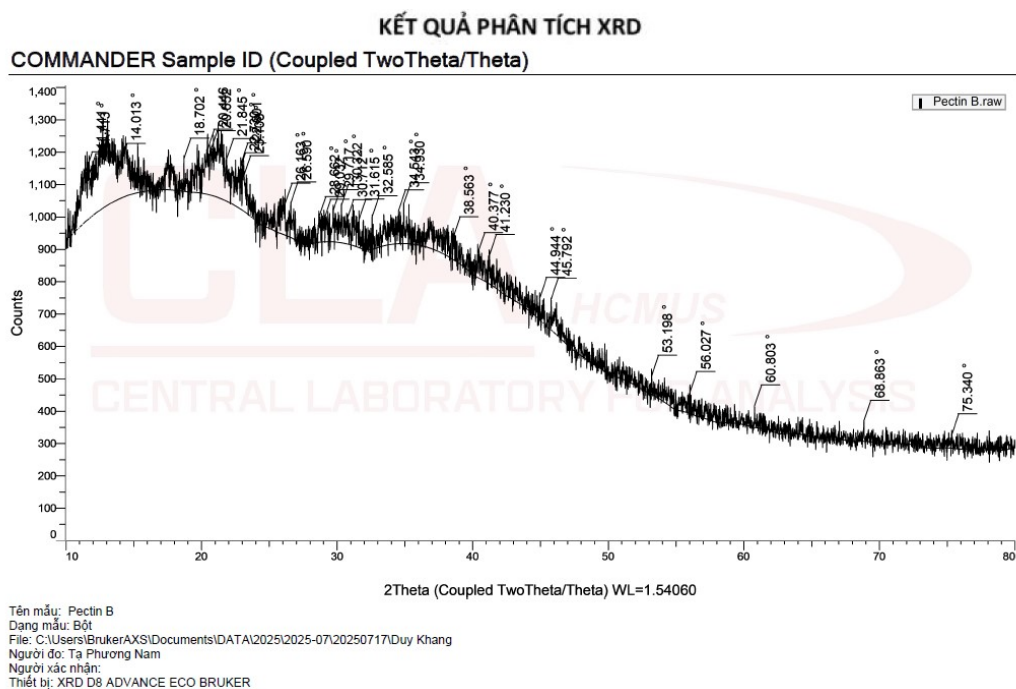

**Figure S3: The XRD diffractogram of grapefruit pectin.**



## ZTS1240 - Report - Size

Malvern Panalytical

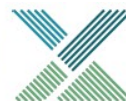

Statistics Table

| Name                           | Mean    | Standard Deviation | RSD    | Minimum | Maximum |  |
|--------------------------------|---------|--------------------|--------|---------|---------|--|
| Z-Average (nm)                 | 248.3   | 91.17              | 36.71  | 163.5   | 344.8   |  |
| Polydispersity Index (PI)      | 0.2448  | 0.04913            | 20.07  | 0.2132  | 0.3014  |  |
| Intercept                      | 0.8547  | 0.0304             | 3.557  | 0.8285  | 0.888   |  |
| Derived Mean Count Rate (kcps) | 4822    | 718.2              | 14.89  | 4104    | 5540    |  |
| Cuvette Position (mm)          | 4.64    | 0                  | 0      | 4.64    | 4.64    |  |
| Number Of Size Runs            | 30      | 0                  | 0      | 30      | 30      |  |
| Run Retention (%)              | 99.05   | 1.65               | 1.665  | 97.14   | 100     |  |
| In Range (%)                   | 81.11   | 0.5338             | 0.6581 | 80.6    | 81.66   |  |
| Fit Error                      | 0.04153 | 0.01855            | 44.68  | 0.02214 | 0.05912 |  |
| Detector Angle (°)             | 173     | 0                  | 0      | 173     | 173     |  |

Text Box

### ZTS1240 - Verification Criteria

| Parameter                  | Typical Mean Value | Minimum Mean Value | Maximum Mean Value | Criteria   |
|----------------------------|--------------------|--------------------|--------------------|------------|
| Z-Average (nm):            | 300                | 288                | 328                | Pass/Fail  |
| Polydispersity Index (PI): | <0.1               | 0.0                | 0.15               | Pass/Fail  |
| Run Retention (%):         | >90%               | N/A                | N/A                | Indicative |

**Figure S5: The size of the pectin-decorated silver nanoparticles.**

Statistics Table

| Name                           | Mean    | Standard Deviation | RSD    | Minimum | Maximum |  |
|--------------------------------|---------|--------------------|--------|---------|---------|--|
| Z-Average (nm)                 | 421.4   | 26.1               | 6.193  | 398.9   | 450     |  |
| Polydispersity Index (PI)      | 0.3573  | 0.02088            | 5.843  | 0.3383  | 0.3797  |  |
| Intercept                      | 0.8853  | 0.002032           | 0.2296 | 0.883   | 0.887   |  |
| Derived Mean Count Rate (kcps) | 1864    | 40.13              | 2.153  | 1822    | 1902    |  |
| Cuvette Position (mm)          | 4.64    | 0                  | 0      | 4.64    | 4.64    |  |
| Number Of Size Runs            | 30      | 0                  | 0      | 30      | 30      |  |
| Run Retention (%)              | 97.94   | 1.803              | 1.841  | 96.67   | 100     |  |
| In Range (%)                   | 69.42   | 3.371              | 4.856  | 66.55   | 73.13   |  |
| Fit Error                      | 0.04584 | 0.002087           | 4.553  | 0.04343 | 0.04718 |  |
| Detector Angle (°)             | 173     | 0                  | 0      | 173     | 173     |  |

Text Box

## ZTS1240 - Verification Criteria

| Parameter                  | Typical Mean Value | Minimum Mean Value | Maximum Mean Value | Criteria   |
|----------------------------|--------------------|--------------------|--------------------|------------|
| Z-Average (nm):            | 300                | 288                | 328                | Pass/Fail  |
| Polydispersity Index (PI): | <0.1               | 0.0                | 0.15               | Pass/Fail  |
| Run Retention (%):         | >90%               | N/A                | N/A                | Indicative |

**Figure S6: The size of AgGPe after encountering manganese ions in aqueous solution.**

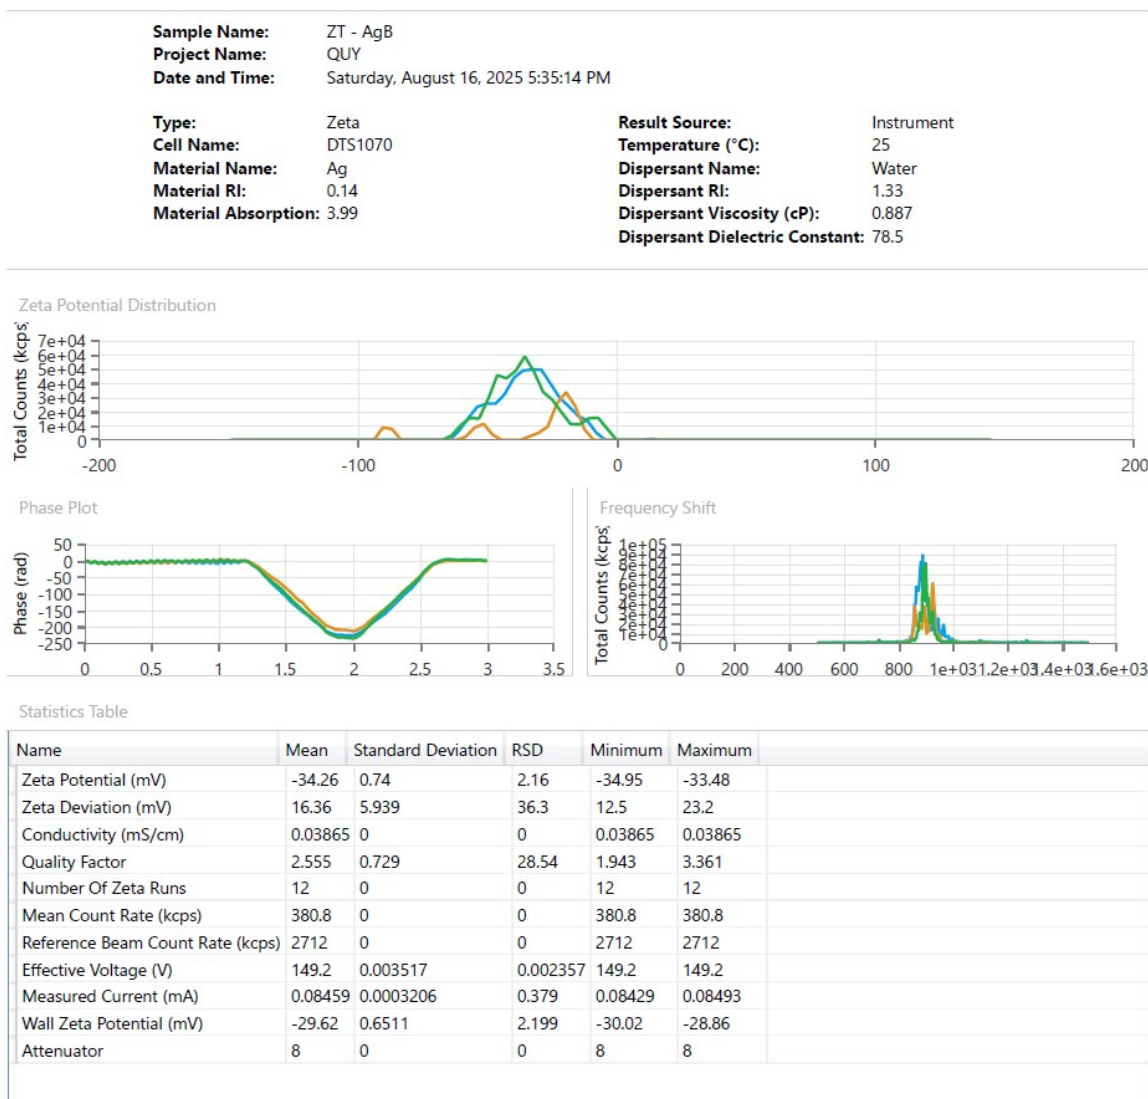

**Figure S7: The zeta measurement of pectin-decorated silver nanoparticles.**

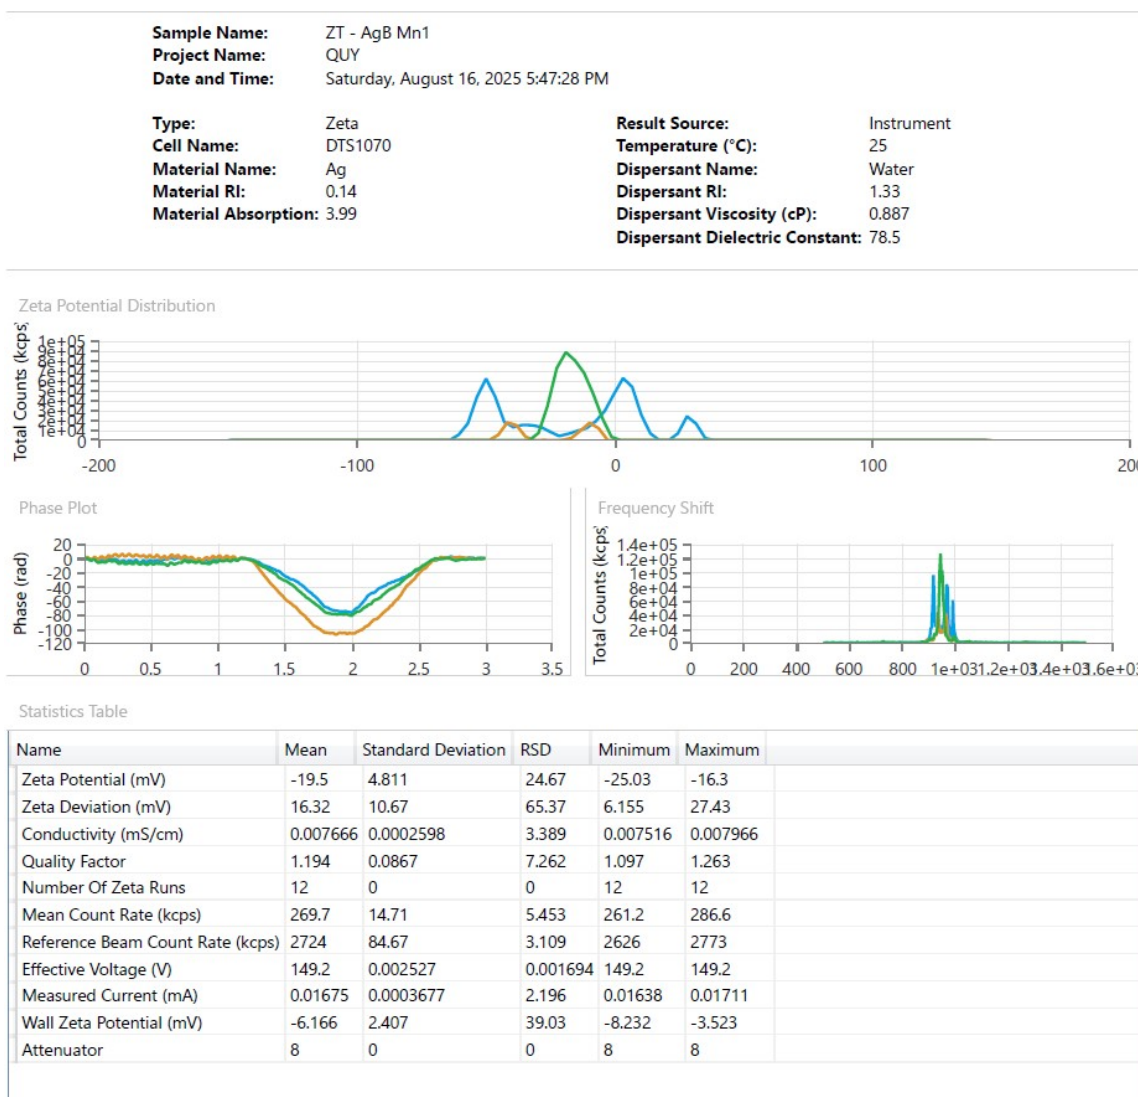

**Figure S8: The zeta of AgGPe after encountering manganese ions in aqueous solution.**
